# Supplementary material for: Crystallization of FeOOH via iron salts: an anion-chemoaffinity controlled hydrolysis toward high performance inorganic pseudocapacitor materials
Source: Royal Society of Chemistry journal article supplement (doi:10.1039/c4ce02543a), 2015-01-01
Supplement: c4ce02543a1.pdf [file c4ce02543a1.pdf]

## Supporting information

### **Crystallization of FeOOH via iron salts: an anion-chemoaffinity controlled hydrolysis toward high performance inorganic pseudocapacitor materials**

Mu Zhang<sup>1</sup>, Kunfeng Chen<sup>2</sup>, Xu Chen<sup>2</sup>, Xiaoyang Peng<sup>1,2</sup>, Xudong Sun<sup>1,\*</sup> and

Dongfeng Xue<sup>2,\*</sup>

1 Key Laboratory for Anisotropy and Texture of Materials (Ministry of Education), School of Materials and Metallurgy, Northeastern University, Shenyang, Liaoning 110819, China

2 State Key Laboratory of Rare Earth Resource Utilization, Changchun Institute of Applied Chemistry, Chinese Academy of Sciences, Changchun 130022, China

\*Corresponding author: E-mail: xdsun@mail.neu.edu.cn, dongfeng@ciac.ac.cn

### **Experimental section**

The FeOOH samples were synthesized by the hydrolysis of 0.1M different types of Fe<sup>2+</sup> or Fe<sup>3+</sup> salts, including FeSO<sub>4</sub>, FeCl<sub>2</sub>, FeCl<sub>3</sub> and Fe(NO<sub>3</sub>)<sub>3</sub>. After preparation of above Fe<sup>2+</sup> or Fe<sup>3+</sup> solution, they were transferred into oven at 80 °C for duration of 8 hours. Eventually, FeOOH samples with different morphologies were successfully prepared. As-prepared FeOOH samples were washed, centrifuged and dried. At last, as-obtained samples were sent to carry out the further characterizations. Field-emission scanning electron microscopy (FESEM, Hitachi-S4800) was used to investigate the morphology of samples. To test supercapacitive performance, cyclic voltammetry (CV) and galvanostatic charge-discharge measurements were carried out by an electrochemical work station (CHI 660D). A mixture of the as-prepared samples, acetylene black and polyvinylidene fluoride (PVDF) with weight ratio of

70:20:10 was pressed on porous nickel foil in order to act as working electrode. Pt wire was used as a counter electrode and saturated calomel electrode (SCE) was served as a reference electrode. All of the electrodes were tested in 2 M KOH solution electrolyte.

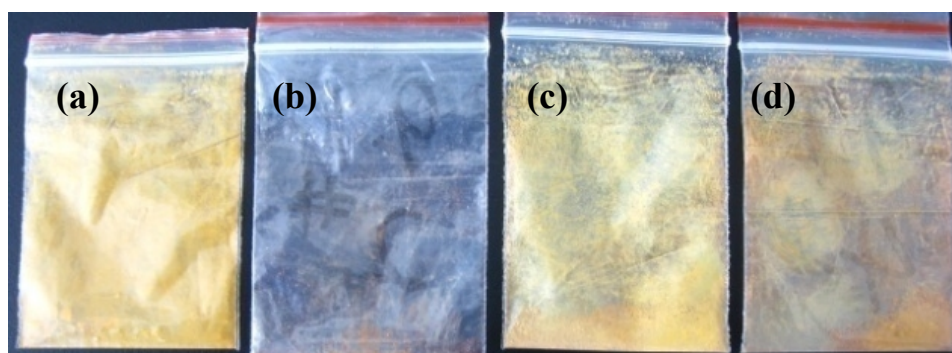

Fig. S1. Different optical colors of the as-obtained FeOOH samples by using (a) 0.1 M FeSO<sub>4</sub> solution; (b) 0.1 M FeCl<sub>2</sub> solution; (c) 0.1 M FeCl<sub>3</sub> solution; (d). 0.1 M Fe(NO<sub>3</sub>)<sub>3</sub> solution.

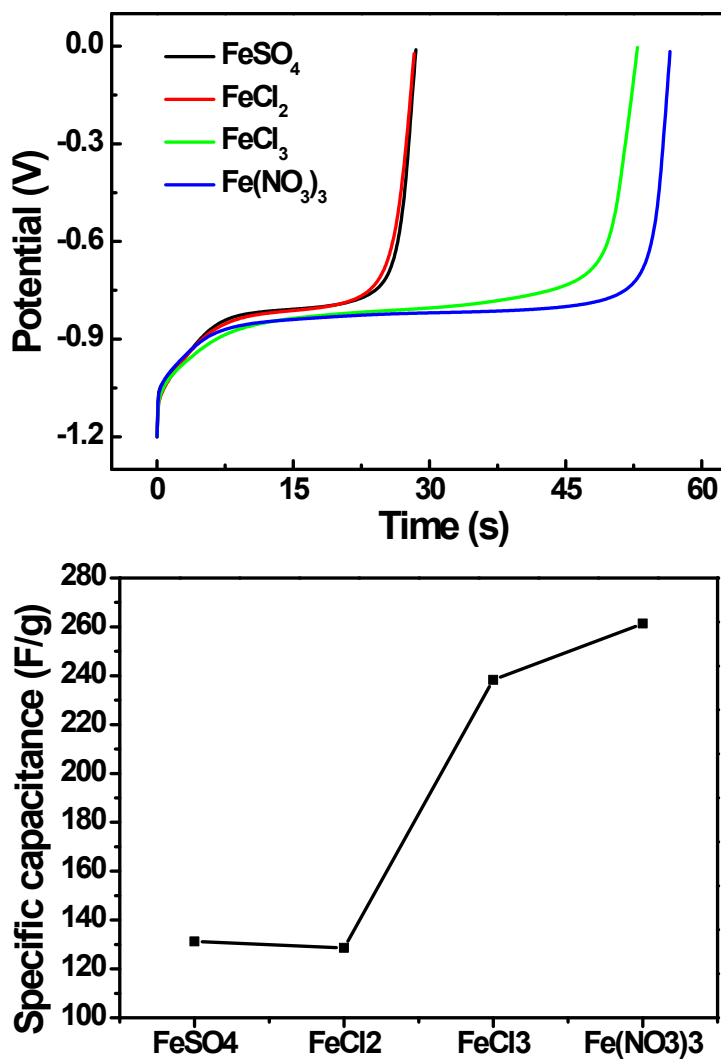

Fig S2. (a) Constant current discharge tests at the current density of 5 A/g within the potential range from  $-1.2$  to 0 V. (c) The measured specific capacitance of the as-prepared pseudocapacitor electrodes at the current density of 5 A/g and within the potential range from  $-1.2$  to 0 V.
